# Supplementary material for: Radiosterilized Pig Skin, Silver Nanoparticles and Skin Cells as an Integral Dressing Treatment for Burns: Development, Pre-Clinical and Clinical Pilot Study
Source: MDPI journal article supplement (doi:10.3390/pharmaceutics15082105), 2023-08-09
Supplement: s1 [file s1]

## Supplementary material

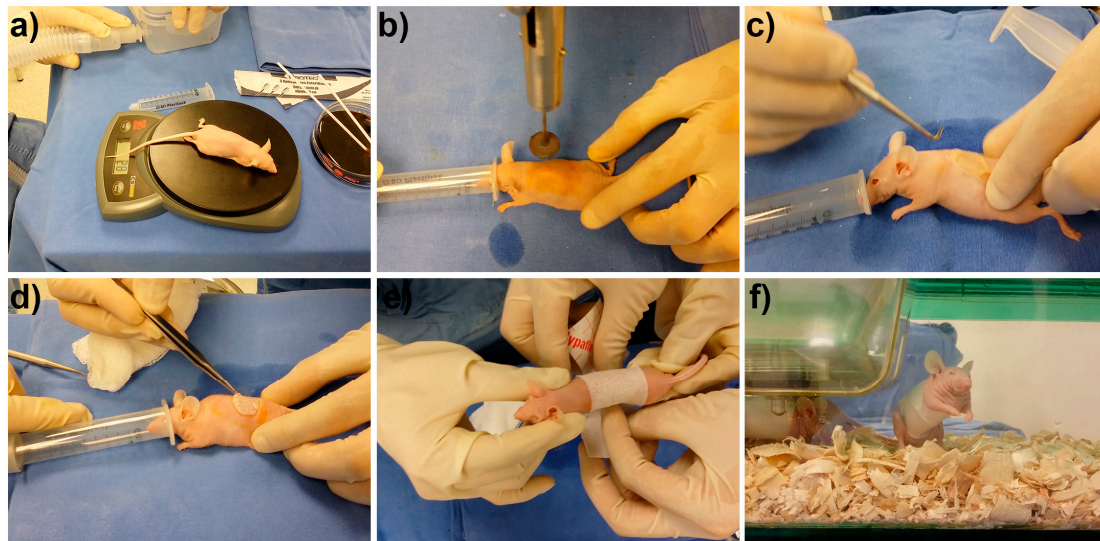

**Figure S1. Procedure for the implantation of antibacterial cover; RPS-AgNPs125.** a) initial mouse weighing after anesthesia with isoflurane 6%; b) second-degree deep burn (2 cm<sup>2</sup>) induction on the back of the mouse using a 366 g apparatus with a circular copper tip at 225 °C per 5 seconds in contact with the mouse back; c) debridement and washing of the burned area with PBS; d) application of treatments (gauze, RPS, RPS-AgNPs125 or AgNPs in 1000 ppm suspension); e) complete wound dressing with Hypafix® and f) analgesia application and mouse consciousness recovery.

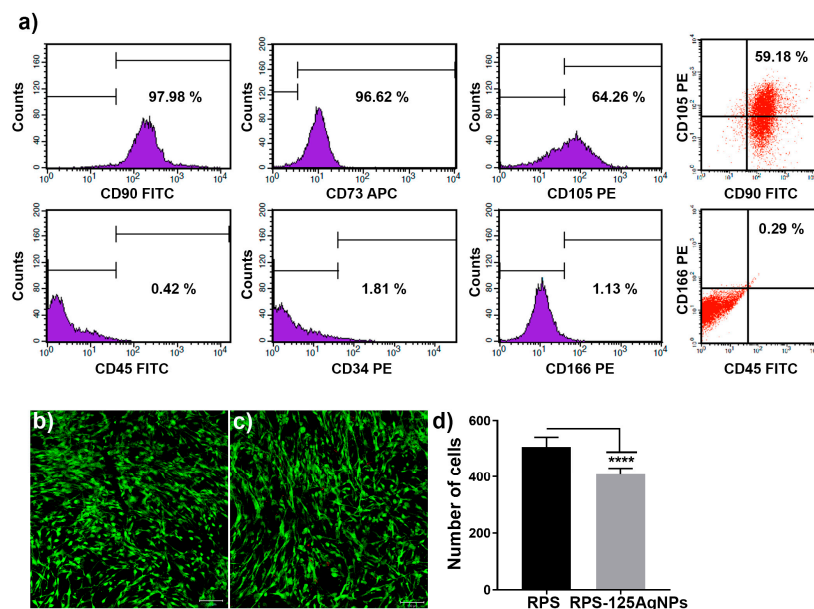

**Figure S2. The RPS and RPS-AgNPs125 allow cell attachment and viability of MSC.** a) Data correspond to the percentage of MSC labeled with primary monoclonal antibodies conjugated to a fluorochrome and analyzed by flow cytometry. The upper panel graphs display MSC expression for CD90-FITC, CD73-APC and CD105-PE. Lower panel graphs show expression for hematopoietic stem cell markers CD45-FITC, CD34-PE, and CD166-PE. Representative live/dead assay photograph showing MSC seeded and culture for 48 h on b) RPS and c) RPS-125AgNPs; viable cells are stained with calcein (green) and dead cells with ethidium homodimer (red). d) The graph represents the number of cells present on RPS and RPS-125AgNPs after 48 h of culture. \*\*\*\* $p < 0.0001$  unpaired Student's t analysis.

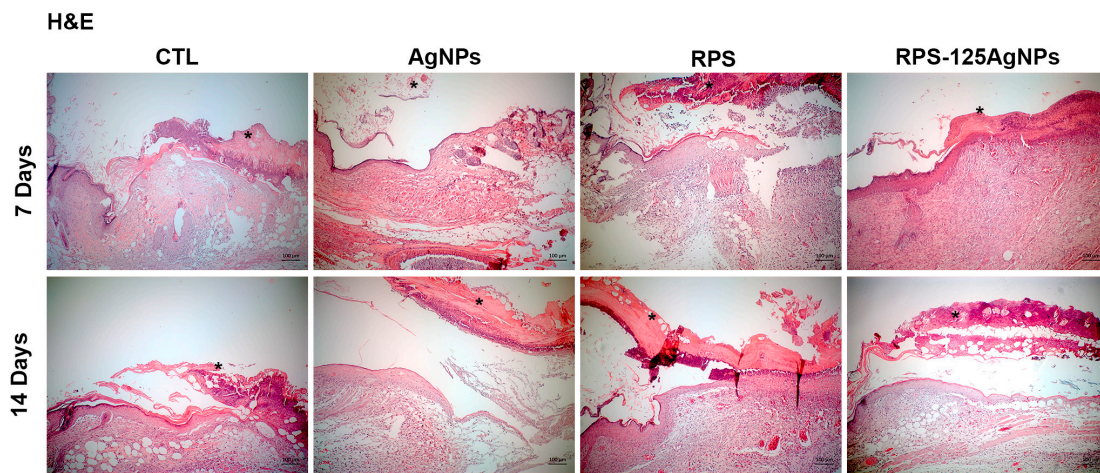

**Figure S3. Hematoxylin & eosin analysis of skin tissue after treatment.** Representative photographs of wound area tissue stained with H&E, at seven and fourteen days after the different treatments. The images were taken at the edges of the lesion, where the epithelium begins to re-epithelize the burn area. Scale bars correspond to 100 μm.

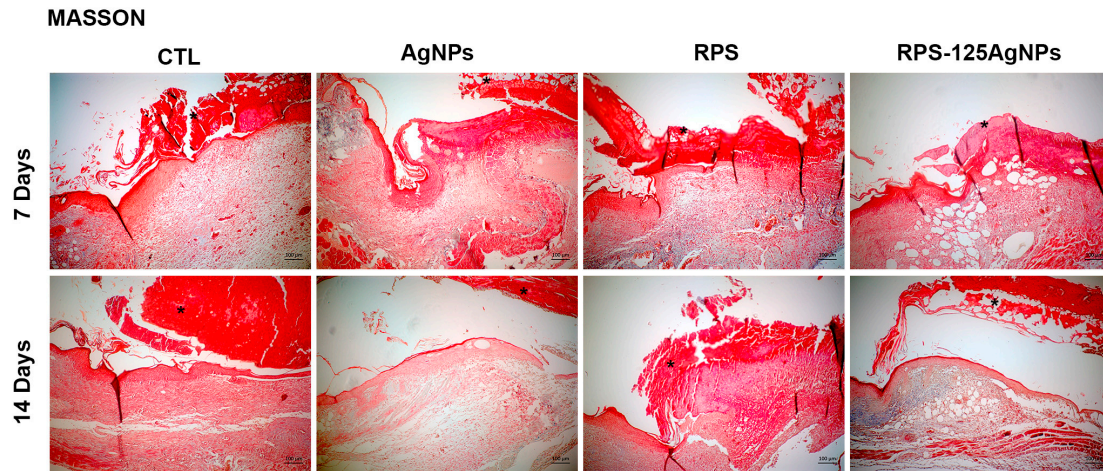

**Figure S4. Masson stain analysis of treatments.** The image shows photographs of histological sections at day seven and fourteen after treatment, stained with Masson. In red it is possible to observe the epidermis and the crust (\*), only in the treatment with RPS and RPS-AgNPs125 at fourteen days it is observed a blue stain (indicating collagen deposition) under the new developed epidermis. Scale bars correspond to 100  $\mu\text{m}$ .

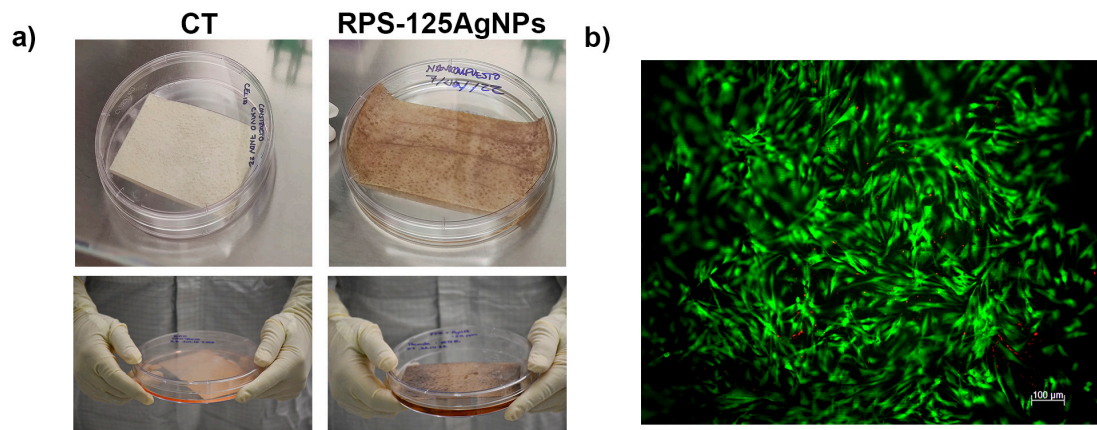

**Figure S5. Development of the construct and the RPS-AgNPs125 cover before implantation.** a) The image at the left upper corner shows the autologous cellular construct, and on the right upper corner, the RPS-AgNPs125 is shown. b) Calcein/Eth-D1 cell viability assay on the construct at the time of implantation.
